# Supplementary material for: Preoperative prediction of the Lauren classification in gastric cancer using automated nnU-Net and radiomics: a multicenter study
Source: Springer Nature journal article supplement (doi:10.1186/s13244-025-01923-9), 2025-02-25
Supplement: MOESM1 [file 13244_2025_1923_MOESM1_ESM.pdf]

# Preoperative Prediction of the Lauren Classification in Gastric Cancer Using Automated nnU-Net and Radiomics: A

## Multicenter Study

### ELECTRONIC SUPPLEMENTARY MATERIAL

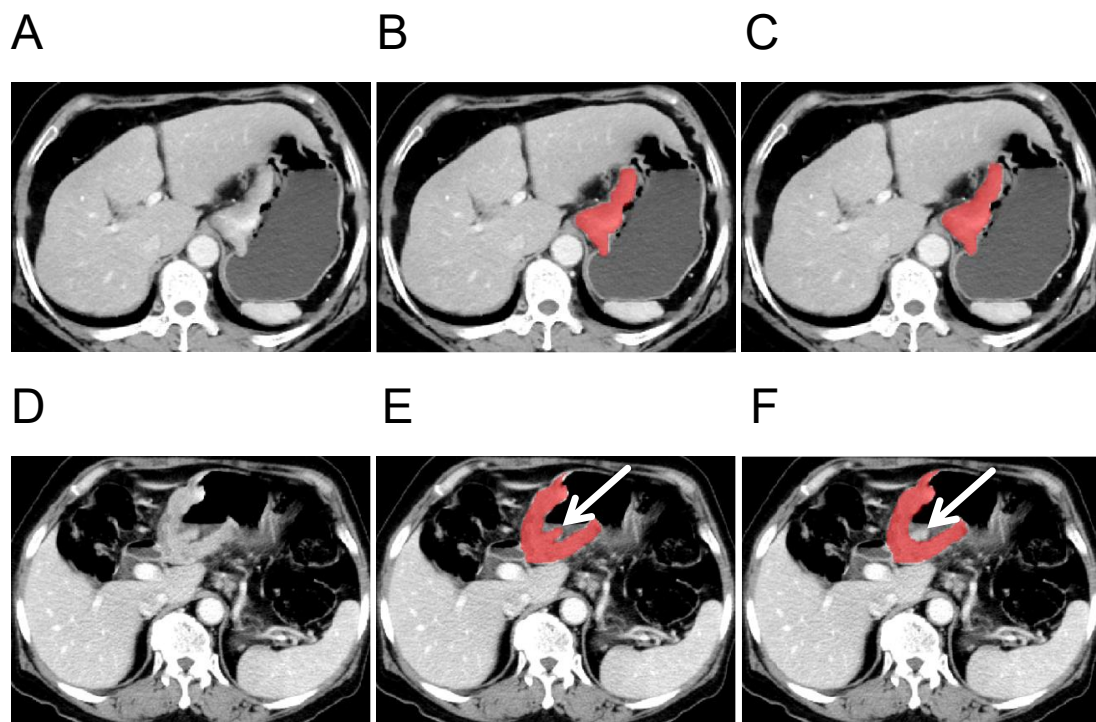

Supplementary Figure 1 Practical Application of the nnU-Net Automatic Segmentation Model in GC: Comparison between Manual Annotation and Automatic Segmentation. Figures (A-C) show the same patient, female, 76 years old, with a Dice Similarity Coefficient of 0.91. Figures (D-F) show another patient, female, 72 years old, with a Dice Similarity Coefficient of 0.78. Figures (A) and (D) are original portal venous phase CT images; Figures (B) and (E) are manually annotated by radiologists; Figures (C) and (F) are annotated by the nnU-Net automatic segmentation model. Figure (C) shows the automatic segmentation closely matches the manual annotation in Figure (B), while Figure (F) shows a tumor area not annotated by the automatic model (indicated by a white arrow).

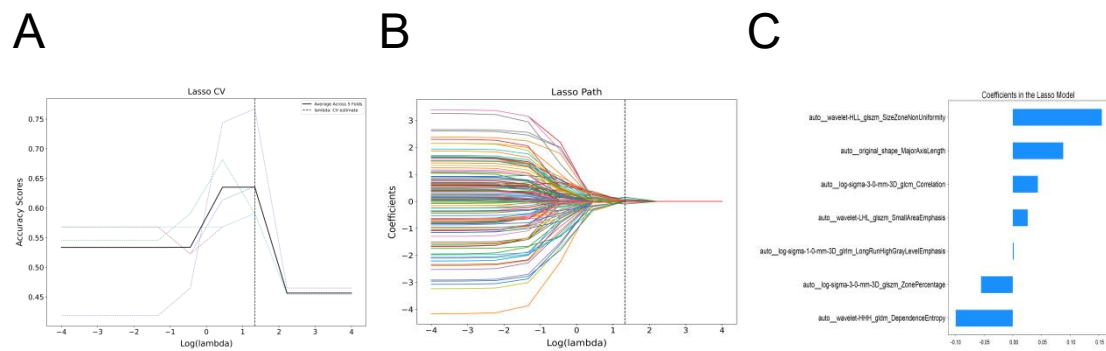

Supplementary Figure 2. Feature selection through Lasso regression analysis. (A) Cross-validation path for determining the optimal regularization parameter lambda. (B) Path of Lasso regression coefficients. (C) Feature Coefficients in the Lasso model.

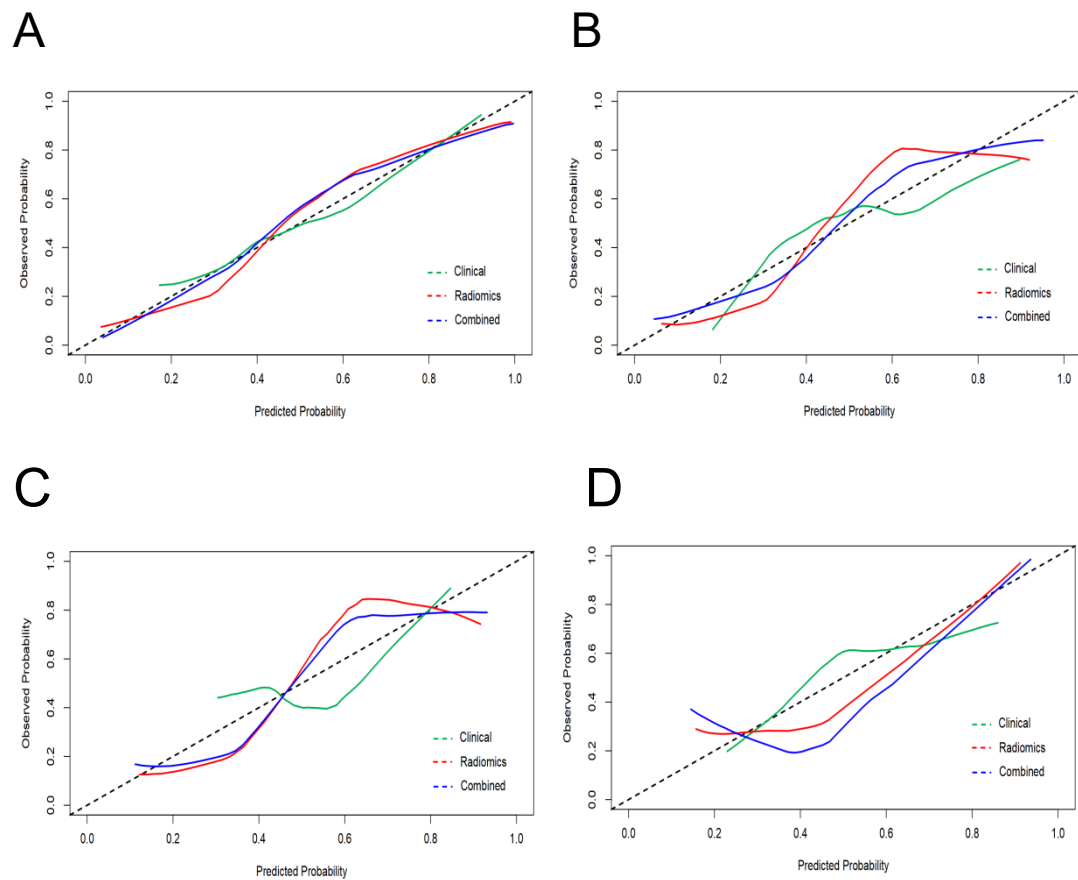

Supplementary Figure 3 Comparison of calibration plots for different models. (A) Training set; (B) Internal validation set; (C) External test set 1; (D) External test set 2. The dashed line represents perfect calibration. The solid lines represent the observed versus predicted probabilities. The green, red, and blue lines represent the clinical model, radiomics model, and combined model, respectively.

A

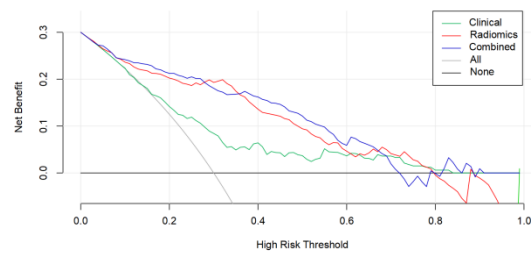

B

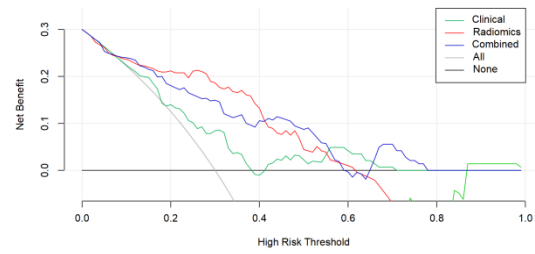

C

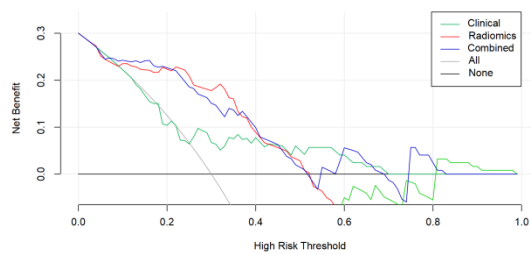

D

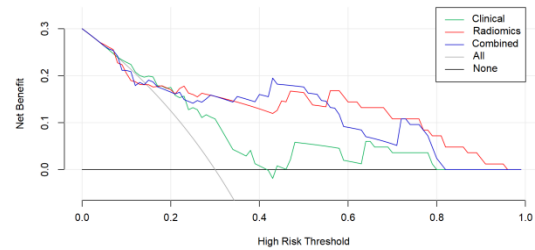

Supplementary Figure 4 Comparison of decision curves for different models. (A) Training set; (B) Internal validation set; (C) External test set 1; (D) External test set 2. The green, red, and blue lines represent the clinical model, radiomics model, and combined model, respectively.

Supplementary Table 1. DeLong Test Results Between Different Datasets and Models

| Datasets                | Comparison Models     | <i>P</i> value |
|-------------------------|-----------------------|----------------|
| Training Set            | Radiomics vs Clinical | <0.001         |
|                         | Combined vs Clinical  | <0.001         |
|                         | Radiomics vs Combined | 0.731          |
| Internal Validation Set | Radiomics vs Clinical | 0.004          |
|                         | Combined vs Clinical  | 0.025          |
|                         | Radiomics vs Combined | 0.548          |
| External Test Set 1     | Radiomics vs Clinical | 0.018          |
|                         | Combined vs Clinical  | 0.029          |
|                         | Radiomics vs Combined | 0.857          |
| External Test Set 2     | Radiomics vs Clinical | 0.331          |
|                         | Combined vs Clinical  | 0.292          |
|                         | Radiomics vs Combined | 0.935          |
